# Supplementary material for: Mechanistic insights into electrocatalytically reduced OER performance in marigold-like trimetallic NiFe-based LDH: charge localisation and d-band orbital filling
Source: Royal Society of Chemistry journal article supplement (doi:10.1039/d3ta07489g), 2024-01-01
Supplement: d3ta07489g1.pdf [file d3ta07489g1.pdf]

## Electronic Supplementary Information

### **Mechanistic insights into electrocatalytically reduced OER performance in marigold-like trimetallic NiFe-based LDH:**

### **Charge localisation and d-band orbital filling**

Suvankar Deka,<sup>ab</sup> Manju Kumari Jaiswal,<sup>ab</sup> Parasmani Rajput,<sup>cd</sup> Biswajit Choudhury<sup>\*ab</sup>

<sup>a</sup>Materials and Energy Laboratory, Physical Sciences Division, Institute of Advanced Study in Science and Technology (IASST), Paschim Boragaon, Vigyan Path, Assam-781035, India

<sup>b</sup>Academy of Scientific and Innovative Research (AcSIR), Ghaziabad- 201002, India

<sup>c</sup>Beamline Development and Application Section, Bhabha Atomic Research Centre,  
Trombay, Mumbai-400085, India

<sup>d</sup>Homi Bhabha National Institute, Anushakti Nagar, Mumbai-400 094, India

\*Email: [biswajitchoudhury@iasst.gov.in](mailto:biswajitchoudhury@iasst.gov.in), [biswa.tezu@gmail.com](mailto:biswa.tezu@gmail.com)

## Section S1

### Turn Over Frequency (TOF) Calculation

$$\text{TOF} = (j \times N_A) / (F \times n \times \Gamma) \quad \dots\dots\dots (1)$$

Where  $j$  is current density at a particular overpotential,  $N_A$  is Avogadro Number,  $F$  is Faraday's constant which is equals to  $96485 \text{ C mol}^{-1}$ ,  $n$  is the number of electrons which is equals to 4 for OER,  $\Gamma$  is the surface concentration.

So, first we determined surface concentration of active sites from the redox features of CV.

The calculated area associated with the reduction of  $\text{Ni}^{3+}$  to  $\text{Ni}^{2+}$  of NiFe-LDH is  $0.000929254 \text{ VA}$

$$\begin{aligned} \text{Therefore, the associated charge is} &= (\text{Calculated area} / \text{Scan rate in } \text{Vs}^{-1}) \\ &= 0.000929254 \text{ VA} / 0.05 \text{Vs}^{-1} = 0.01859 \text{C} \end{aligned}$$

$$\text{Therefore, the number of electron transferred is} = 0.01286 \text{ C} / 1.602 \times 10^{-19} \text{ C} = 1.16012 \times 10^{17}$$

Since, the reduction of  $\text{Ni}^{3+}$  to  $\text{Ni}^{2+}$  is a single electron transfer reaction, the number of electrons calculated above is exactly the same as the number of surface-active sites.

Plugging the above value  $\Gamma$ , and value of  $j$  at an overpotential of 100 mV into equation S1 we have,

$$\begin{aligned} \text{TOF} &= (j \times N_A) / (F \times n \times \Gamma) \\ &= (3.09 \times 10^{-3} \times 6.022 \times 10^{23}) / 96485 \times 4 \times 1.16012 \times 10^{17} \\ &= 0.042 \text{ sec}^{-1} \end{aligned}$$

Similarly, we have calculated the TOF of NiFe LDH @ 150 mV, 200 mV, 250 mV and 300 mV.

Following the aforementioned procedure, the TOF of ZNF and CNF at different overpotentials (100 mV, 150 mV, 200 mV, 250 mV and 300 mV) has been calculated.

## Section S2

### Mott–Schottky Analysis

According to Mott–Schottky theory, the space charge capacitance exhibits a dependence on potential given by the equation<sup>1</sup>:

$$\frac{1}{C^2} = \frac{2}{e\epsilon\epsilon_0 N_D} \left( E_{\text{applied}} - E_{FB} - \frac{KT}{e} \right) \dots\dots\dots (2)$$

where  $C$  signifies the capacitance belonging to the space charge region,  $e$  indicates the electronic charge ( $1.602 \times 10^{-19}$  C),  $\epsilon$  being the dielectric constant ( $\epsilon \sim 3.6$ ),  $\epsilon_0$  is the vacuum permittivity given by  $8.854 \times 10^{-14}$  Fcm<sup>-1</sup>,  $E_{\text{applied}}$ , and  $E_{FB}$  are the applied and flat band potentials,  $N_D$  is carrier concentration (donor density),  $k$  and  $T$  being the Boltzmann constant and absolute temperature (298 K), respectively. Subsequently, linear fitting of  $C^{-2}$  versus  $V$  plot yields the slope which is equal to  $2/(q\epsilon\epsilon_0 N_D)$ . Employing the relation,  $N_D = 2/(q\epsilon\epsilon_0 \times \text{slope})$  the carrier concentration for NF, ZNF and CNF were determined.

## FIGURE FILES

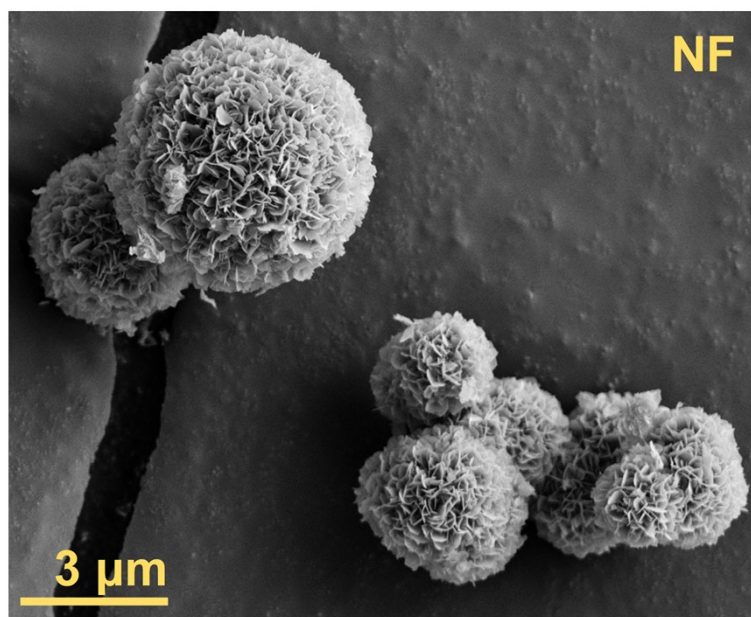

Fig. S1 SEM image of NF.

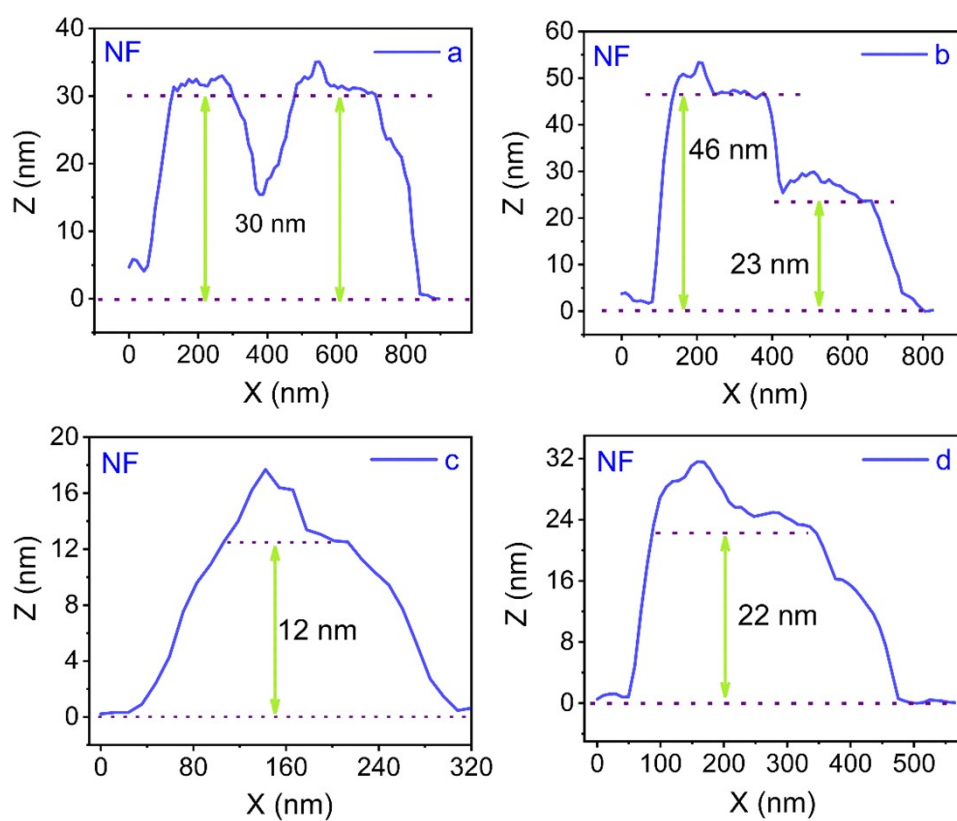

**Fig. S2** AFM height profiles of NF.

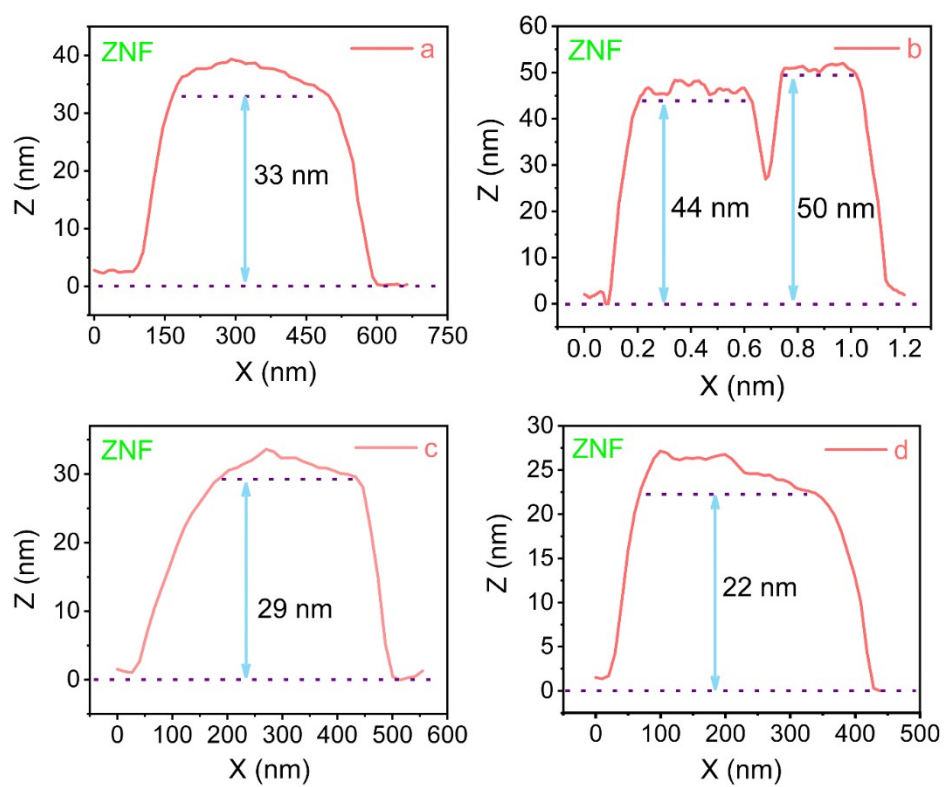

**Fig. S3** AFM height profiles of ZNF.

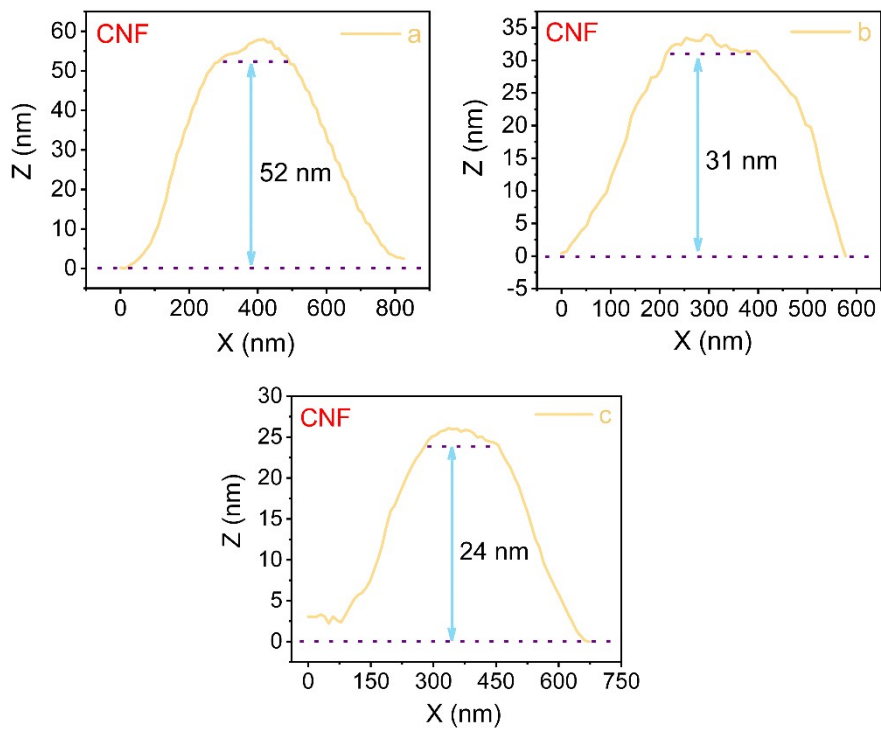

**Fig. S4** AFM height profiles of CNF.

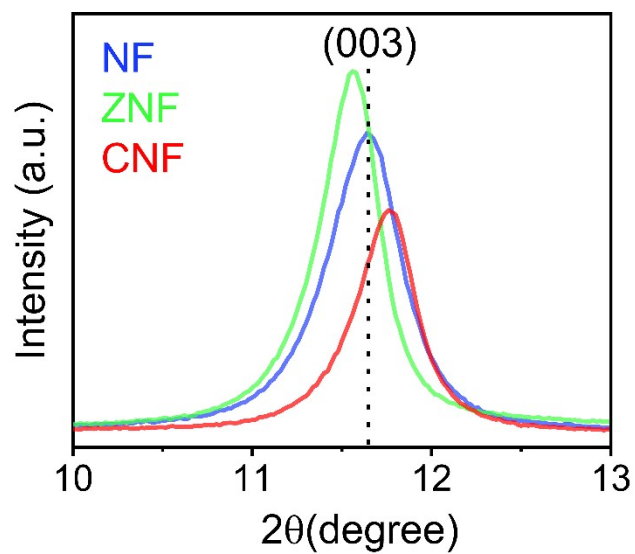

**Fig. S5** XRD pattern of NF, ZNF, and CNF showing sifting of (003) plane.

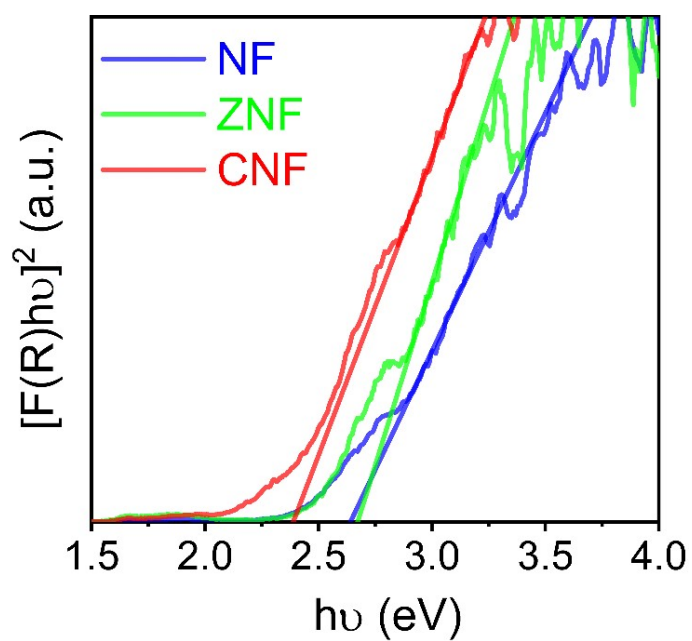

**Fig. S6** Tauc's plot of as-synthesized NF, ZNF, and CNF.

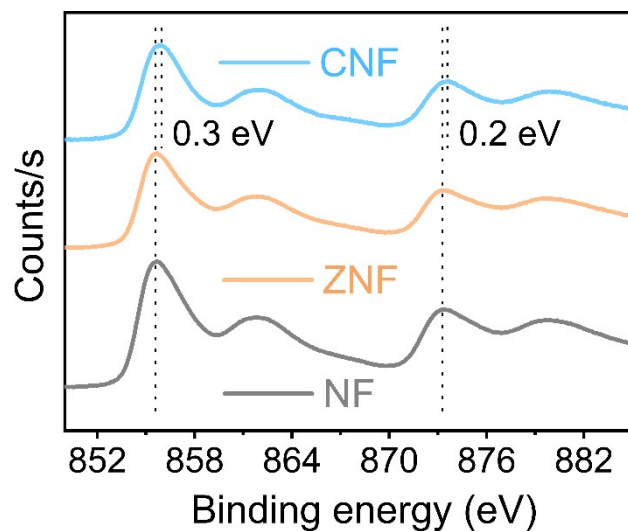

**Fig. S7** Ni 2p Spectra for NF, ZNF, and CNF.

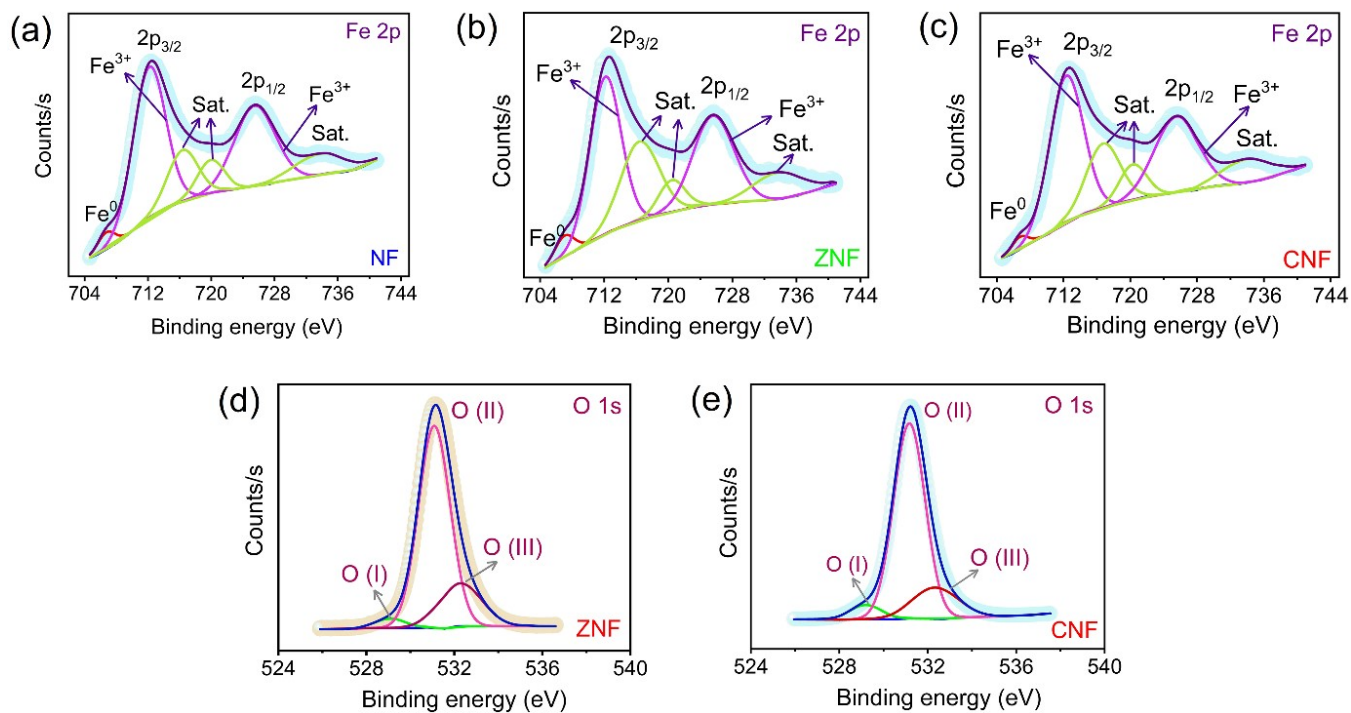

**Fig. S8** XPS plots of (a-c) Fe 2p spectrum for NF, ZNF, and CNF (d,e) O 1s spectrum for ZNF and CNF

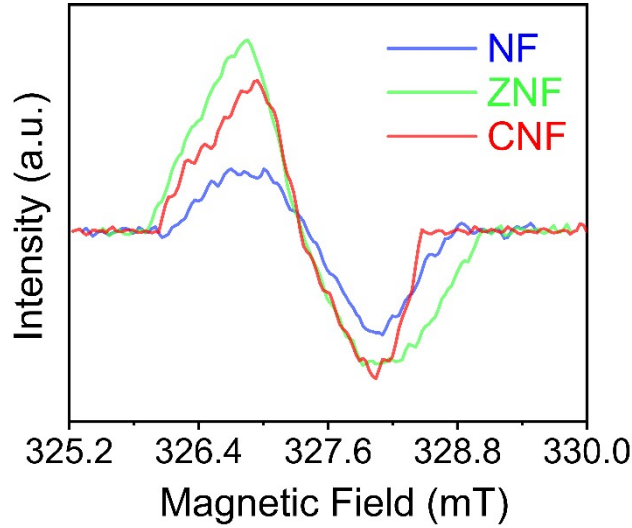

**Fig. S9** EPR spectra of NF, ZNF, and CNF

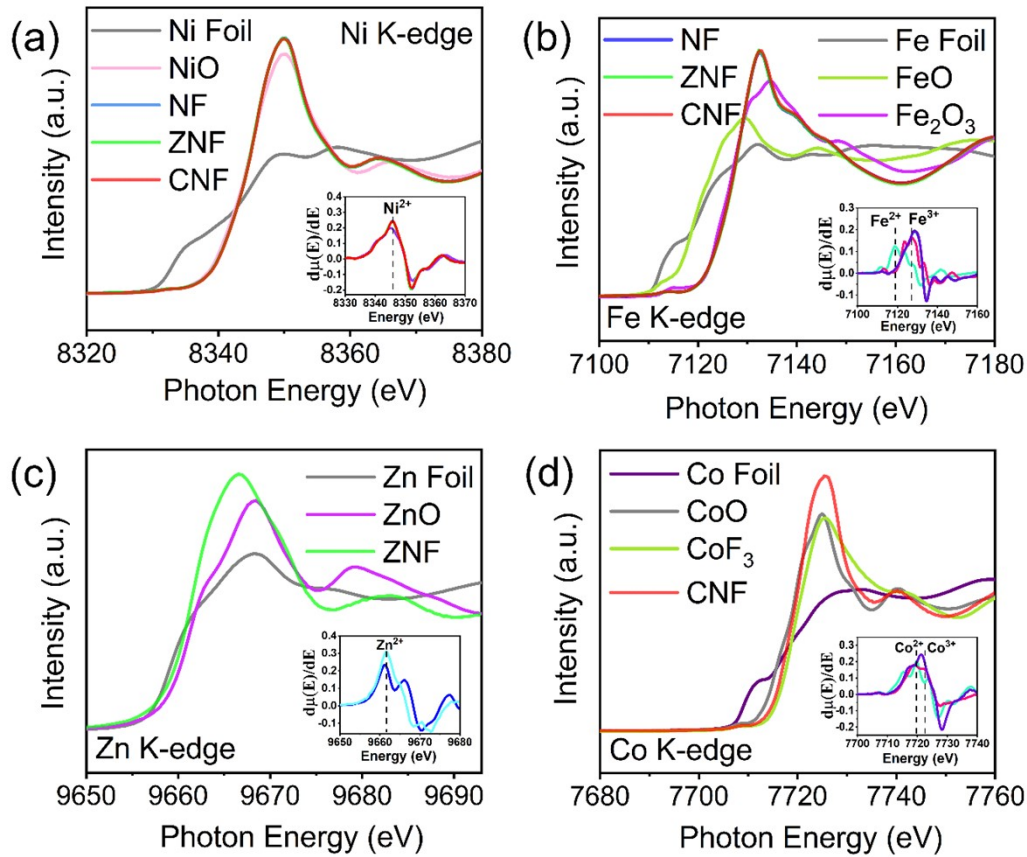

**Fig. S10** XANES spectra of (a) Ni K-edge for NF, ZNF, and CNF (b) Fe K-edge for NF, ZNF and CNF. (c) Zn K-edge for ZNF. (d) Co K-edge for CNF along with references Ni foil, NiO, Fe foil, FeO, Fe<sub>2</sub>O<sub>3</sub>, Zn foil, ZnO, Co foil, CoO, and CoF<sub>3</sub>. The first derivate spectra of Ni K-edge, Fe K-edge, Zn K-edge, and Co K-edge have been shown as inset in their corresponding XANES spectra.



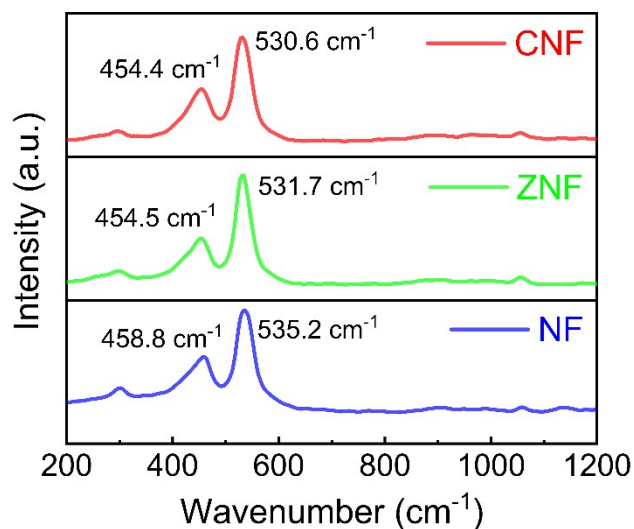

**Fig. S11** Raman Profiles of NF, ZNF, and CNF within a scope of 200  $\text{cm}^{-1}$  – 1200  $\text{cm}^{-1}$ .

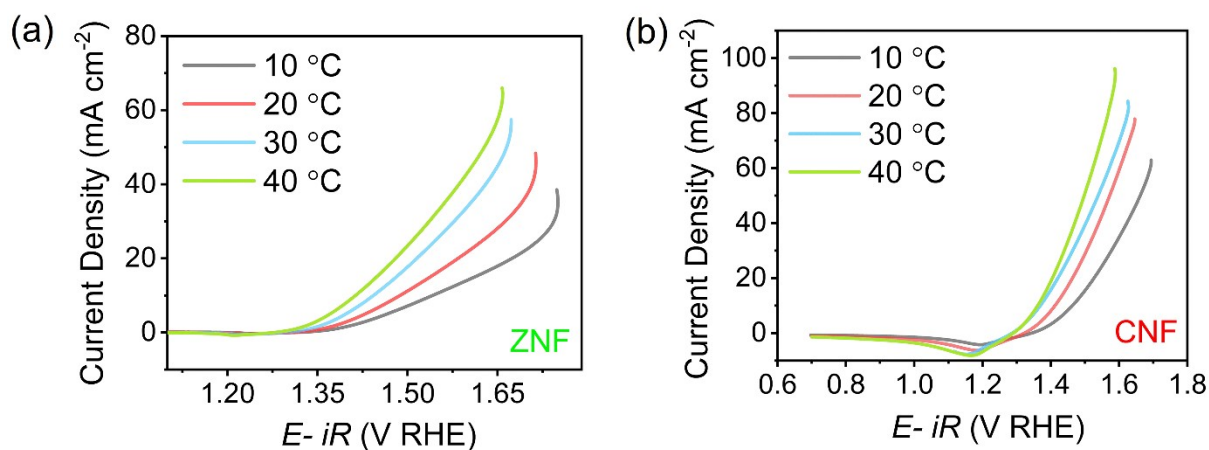

**Fig. S12** Polarization curves of (a) ZNF and (b) CNF at temperatures ranging from (10 °C to 40 °C)

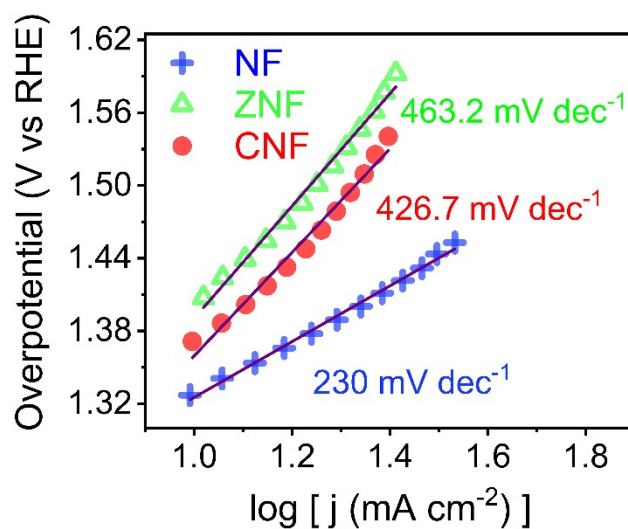

**Fig. S13** Tafel plots of NF, ZNF, and CNF obtained from chronoamperometric measurements with  $iR$ -corrected overpotential.

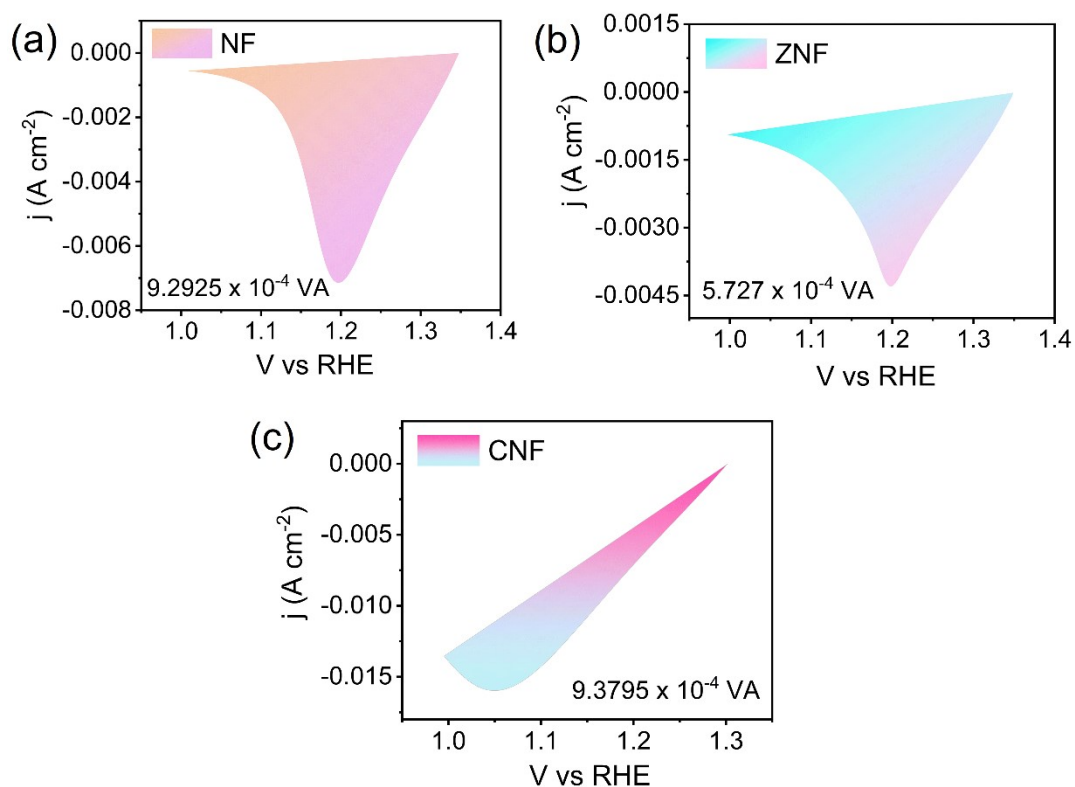

**Fig. S14** Reduction surface area of (a) NF (b) ZNF and (c) CNF for calculating TOF. (turn-over frequency)

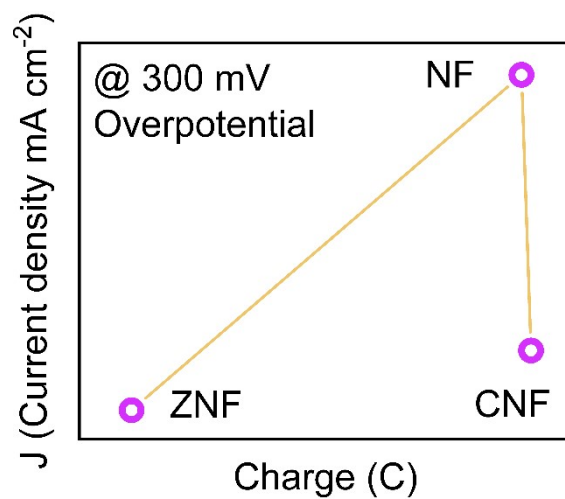

**Fig. S15** Accumulation of charge over the catalyst surface vs current density at a potential of 1.53 V vs RHE.

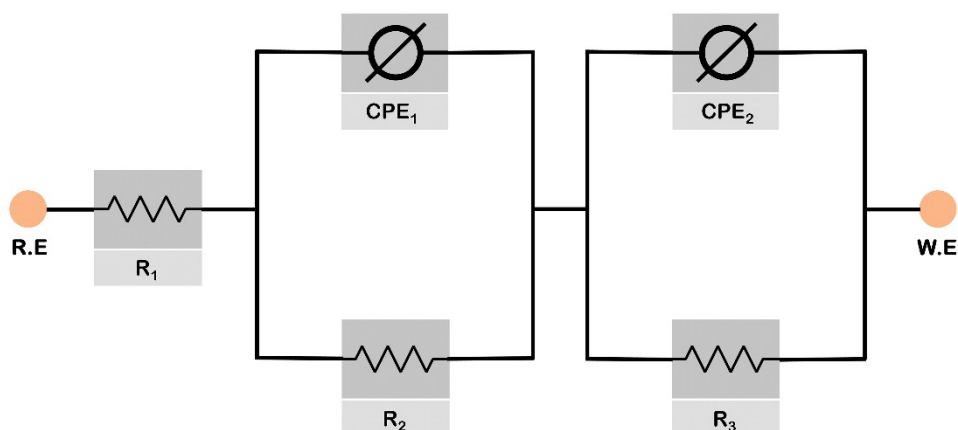

**Fig. S16** Modified Randles equivalent electrical circuit model (2R CPE) for fitting EIS data.

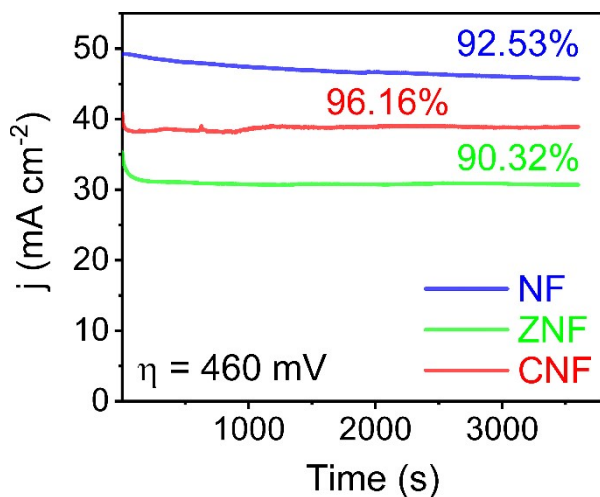

**Fig. S17** Chronoamperometric curves of NF, ZNF, and CNF recorded at an overpotential of 460 mV without iR Correction.

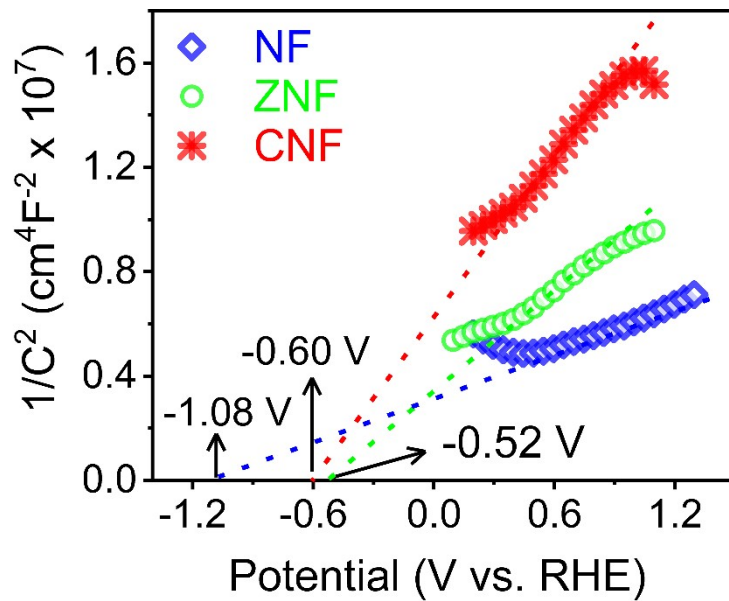

Fig. S18 Mott-Schottky Plot for NF, ZNF and CNF.

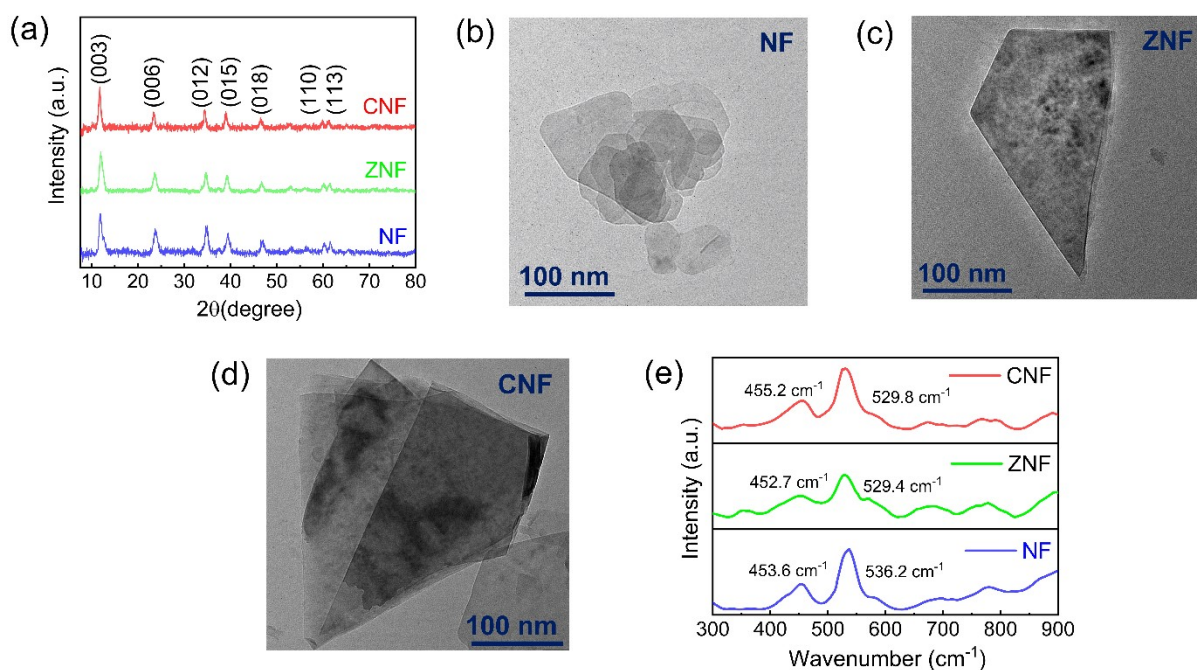

Fig S19. Post characterization (a) XRD patterns, (b-d) TEM images of NF, ZNF, and CNF (e) Raman profile of NF, ZNF, and CNF.

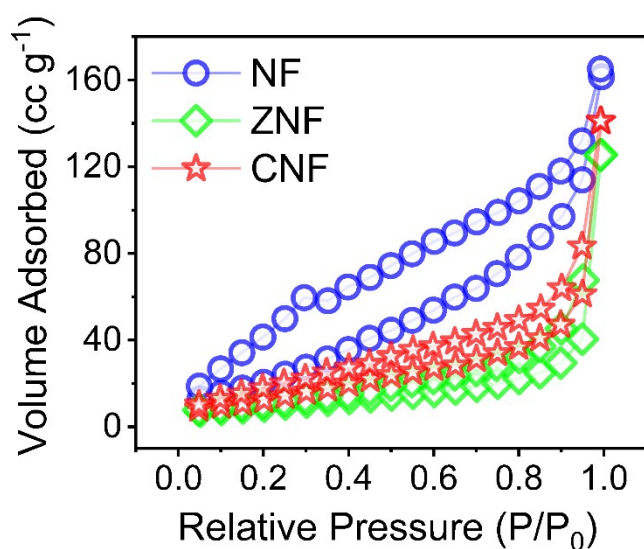

**Fig. S20** Nitrogen adsorption/desorption isotherm

## TABLES

**Table S1** XPS fitting parameters for the binding energies of the as-prepared catalysts.

| Catalyst | Peak position (eV) |                   |                   |                   |                   |                   |                   |                   |                   |                   |                   |                   |
|----------|--------------------|-------------------|-------------------|-------------------|-------------------|-------------------|-------------------|-------------------|-------------------|-------------------|-------------------|-------------------|
|          | Ni <sup>2+</sup>   |                   | Ni <sup>3+</sup>  |                   | Fe <sup>3+</sup>  |                   | Zn <sup>2+</sup>  |                   | Co <sup>2+</sup>  |                   | Co <sup>3+</sup>  |                   |
|          | 2p <sub>3/2</sub>  | 2p <sub>1/2</sub> | 2p <sub>3/2</sub> | 2p <sub>1/2</sub> | 2p <sub>3/2</sub> | 2p <sub>1/2</sub> | 2p <sub>3/2</sub> | 2p <sub>1/2</sub> | 2p <sub>3/2</sub> | 2p <sub>1/2</sub> | 2p <sub>3/2</sub> | 2p <sub>1/2</sub> |
| NF       | 855.               | 872.              | 856.              | 874.              | 712.              | 725.              | -                 | -                 | -                 | -                 | -                 | -                 |
|          | 2                  | 8                 | 6                 | 3                 | 2                 | 5                 |                   |                   |                   |                   |                   |                   |
| ZNF      | 855.               | 872.              | 856.              | 874.              | 711.              | 725.              | 1021.             | 1044.             | -                 | -                 | -                 | -                 |
|          | 3                  | 9                 | 7                 | 5                 | 9                 | 6                 | 3                 | 4                 |                   |                   |                   |                   |
| CNF      | 855.               | 873.              | 856.              | 874.              | 712.              | 725.              | -                 | -                 | 781.              | 797.              | 780.              | 796.              |
|          | 4                  | 1                 | 6                 | 9                 | 3                 | 5                 |                   |                   | 9                 | 4                 | 5                 | 3                 |

**Table S2** XPS deconvoluted peak positions of O1s Spectra of NF, ZNF and CNF.

| Catalyst | Peak position (eV) |        |         | Constituents (%) |        |         |
|----------|--------------------|--------|---------|------------------|--------|---------|
|          | O (I)              | O (II) | O (III) | O (I)            | O (II) | O (III) |
| NF       | 528.9              | 531.0  | 532.3   | 5.43             | 77.56  | 17.01   |

|     |       |       |       |      |       |       |
|-----|-------|-------|-------|------|-------|-------|
| ZNF | 529.1 | 531.1 | 532.2 | 3.38 | 75.10 | 21.51 |
| CNF | 529.2 | 531.1 | 532.3 | 5.69 | 76.69 | 17.62 |

**Table S3** Structural parameters were obtained by fitting the experimental XAFS data at the Ni K-edge. The CN is the coordination number, R is the interatomic distance, and  $\sigma^2$  is the Debye-Waller factor. The numbers in parentheses indicate the uncertainty in the last digit.

| Sample | Path  | CN      | R(Å)      | $\sigma^2$ (Å <sup>2</sup> ) | R-factor |
|--------|-------|---------|-----------|------------------------------|----------|
| NF     | Ni-O  | 5.6 (2) | 2.053 (2) | 0.0047 (2)                   | 0.014    |
|        | Ni-Ni | 5.9 (3) | 3.095 (3) | 0.0048 (3)                   |          |
| ZNF    | Ni-O  | 5.5 (2) | 2.055 (3) | 0.0048(3)                    | 0.013    |
|        | Ni-Ni | 5.6 (3) | 3.107 (3) | 0.0051(4)                    |          |
| CNF    | Ni-O  | 5.5 (2) | 2.039 (3) | 0.0049(2)                    | 0.013    |
|        | Ni-Ni | 5.8 (3) | 3.111 (3) | 0.0052(4)                    |          |

**Table S4** Structural parameters were obtained by fitting the experimental XAFS data at the Fe K-edge. The CN is the coordination number, R is the interatomic distance, and  $\sigma^2$  is the Debye-Waller factor. The numbers in parentheses indicate the uncertainty in the last digit.

| Sample | Path  | CN      | R(Å)      | $\sigma^2$ (Å <sup>2</sup> ) | R-factor |
|--------|-------|---------|-----------|------------------------------|----------|
| NF     | Fe-O  | 5.5 (2) | 2.010 (2) | 0.0049 (3)                   | 0.011    |
|        | Fe-Fe | 5.8 (3) | 3.097(3)  | 0.0053 (3)                   |          |
| ZNF    | Fe-O  | 5.5 (2) | 2.011(2)  | 0.0049(3)                    | 0.012    |
|        | Fe-Fe | 5.5 (3) | 3.099(4)  | 0.0051(4)                    |          |
| CNF    | Fe-O  | 5.4 (2) | 2.012(3)  | 0.0049(3)                    | 0.011    |
|        | Fe-Fe | 5.7 (3) | 3.099(3)  | 0.0053(4)                    |          |

**Table S5** Structural parameters were obtained by fitting the experimental XAFS data at the Zn K-edge. The CN is the coordination number, R is the interatomic distance, and  $\sigma^2$  is the Debye-Waller factor. The numbers in parentheses indicate the uncertainty in the last digit.

| Sample | Path  | CN      | R(Å)      | $\sigma^2$ (Å <sup>2</sup> ) | R-factor |
|--------|-------|---------|-----------|------------------------------|----------|
| ZNF    | Zn-O  | 4.9 (2) | 2.055 (2) | 0.0065 (3)                   | 0.013    |
|        | Zn-Zn | 4.7 (3) | 3.143 (3) | 0.0065 (3)                   |          |

**Table S6.** Structural parameters were obtained by fitting the experimental XAFS data at the Co K-edge. The CN is the coordination number, R is the interatomic distance, and  $\sigma^2$  is the Debye-Waller factor. The numbers in parentheses indicate the uncertainty in the last digit.

| Sample | Path  | CN      | R(Å)      | $\sigma^2$ (Å <sup>2</sup> ) | R-factor |
|--------|-------|---------|-----------|------------------------------|----------|
| CNF    | Co-O  | 5.1 (2) | 2.062 (3) | 0.0055 (3)                   | 0.013    |
|        | Co-Co | 5.6 (3) | 3.109 (3) | 0.0054 (4)                   |          |

**Table S7** Overpotential, Tafel constant, and Tafel slope values of NF, ZNF, and CNF at different temperatures.

| Sample | Temperature | Overpotential<br>at 10 mA cm <sup>-2</sup><br>(mV) | Tafel<br>Constant<br>(mV) | Tafel Slope                         | Tafel Slope                         |
|--------|-------------|----------------------------------------------------|---------------------------|-------------------------------------|-------------------------------------|
|        |             |                                                    |                           | at region A<br>(mV/dec)<br>Region A | at region B<br>(mV/dec)<br>Region B |
| NF     | 10          | 180                                                | 105                       | 40.9                                | 144.6                               |
|        | 20          | 150                                                | 89                        | 36.4                                | 120.2                               |
|        | 30          | 130                                                | 73                        | 32.5                                | 113.6                               |
|        | 40          | 100                                                | 56.9                      | 27.3                                | 80.7                                |
| ZNF    | 10          | 313                                                | 154                       | 76.2                                | 376.0                               |
|        | 20          | 260                                                | 129                       | 60.0                                | 271.0                               |

|     |    |       |       |      |       |
|-----|----|-------|-------|------|-------|
|     | 30 | 213   | 109   | 54.7 | 225.9 |
|     | 40 | 185   | 85    | 53.9 | 197.7 |
| CNF | 10 | 233.2 | 137.8 | 63.1 | 194.4 |
|     | 20 | 184.2 | 109.3 | 54.1 | 163.4 |
|     | 30 | 140.5 | 72.9  | 51.2 | 157.1 |
|     | 40 | 132.5 | 70.3  | 43.0 | 133.6 |

**Table S8** Steady-State current measured from chronoamperometric curves for NF at various overpotentials.

| NF            |                  | ZNF           |                  | CNF           |                  |
|---------------|------------------|---------------|------------------|---------------|------------------|
| Potential (V) | Current (mA)     | Potential (V) | Current (mA)     | Potential (V) | Current (mA)     |
|               | measured from CA |               | measured from CA |               | measured from CA |
| 0.47          | 9.81             | 0.55          | 10.45            | 0.51          | 9.92             |
| 0.49          | 11.41            | 0.57          | 11.44            | 0.53          | 11.37            |
| 0.51          | 13.31            | 0.59          | 12.72            | 0.55          | 12.75            |



|      |       |      |       |      |       |
|------|-------|------|-------|------|-------|
| 0.53 | 15.28 | 0.61 | 14.02 | 0.57 | 14.10 |
| 0.55 | 17.37 | 0.63 | 15.34 | 0.59 | 15.46 |
| 0.57 | 19.58 | 0.65 | 16.64 | 0.61 | 16.91 |
| 0.59 | 21.92 | 0.67 | 17.85 | 0.63 | 18.20 |
| 0.61 | 24.23 | 0.69 | 19.21 | 0.65 | 19.52 |
| 0.63 | 26.69 | 0.71 | 20.47 | 0.67 | 20.86 |
| 0.65 | 29.21 | 0.73 | 21.84 | 0.69 | 22.27 |
| 0.67 | 31.36 | 0.75 | 23.33 | 0.71 | 23.47 |
| 0.69 | 34.10 | 0.77 | 24.48 | 0.73 | 24.93 |

**Table S9** Comparison table for various state-of-art electrocatalysts for OER.

| Catalyst | Substrate /<br>Electrolyte | Overpotential<br>(mV) | Tafel<br>Slope | C <sub>dl</sub><br>(mF) | TOF<br>(s <sup>-1</sup> ) | Ref. |
|----------|----------------------------|-----------------------|----------------|-------------------------|---------------------------|------|
|----------|----------------------------|-----------------------|----------------|-------------------------|---------------------------|------|

|                                                                      |                | @ 10 mA<br>cm <sup>-2</sup> | (mV<br>dec <sup>-1</sup> ) | cm <sup>-2</sup> ) |       |               |
|----------------------------------------------------------------------|----------------|-----------------------------|----------------------------|--------------------|-------|---------------|
| NiFe LDH                                                             | CC/1 M KOH     | 134.0                       | 101.7                      | 1.62               | 1.12  | Our work      |
| NiFe LDH                                                             | CC/1 M MOH     | 295.0                       | 260.0                      | -                  | 0.092 | <sup>3</sup>  |
| NiFe LDH                                                             | NF/1M KOH      | 320.0                       | 37.0                       | 1.08               | -     | <sup>4</sup>  |
| Ce@NiFe LDH                                                          | NF/1M KOH      | 205.0                       | 40.1                       | 1.52               | 0.084 | <sup>5</sup>  |
| Ni <sub>3</sub> Fe <sub>0.5</sub> V <sub>0.5</sub><br>(oxy)hydroxide | CFP/1M KOH     | 200.0                       | 39.0                       | -                  | 0.574 | <sup>6</sup>  |
| ZnNiFe LDH                                                           | 1 M KOH        | 240.0                       | 273.7                      | 1.09               | 0.35  | Our work      |
| NiFe LDH/ZnO                                                         | NF/1M KOH      | 210.0                       | 63.0                       | 1.1                | -     | <sup>7</sup>  |
| ZnNiFe LDH                                                           | 1M KOH         | 470.0                       | 86.0                       | 0.0003             | -     | <sup>8</sup>  |
| CoNiFe LDH                                                           | 1 M KOH        | 160.0                       | 162.0                      | 1.09               | 0.37  | Our work      |
| NiFeCo-LDH                                                           | GCE/ 1M<br>KOH | 319.0                       | 81.0                       | 0.28               | -     | <sup>9</sup>  |
| NiCoFe LDH                                                           | CFP/1M<br>NaOH | 288.0                       | 92.0                       | 2.62               | -     | <sup>10</sup> |
| CoFe@NiFe-<br>200                                                    | NF/1M KOH      | 190.0                       | 45.7                       | -                  | 0.011 | <sup>11</sup> |
| CoNiFe<br>LDH/RuO <sub>2.1</sub>                                     | GC/1M KOH      | 332.0                       | 48.9                       | -                  | 0.045 | <sup>12</sup> |

**Table S10** Surface Area, Pore Size, and Pore Volume obtained from nitrogen adsorption-desorption isotherms

| Sample | BET Surface Area (m <sup>2</sup> g <sup>-1</sup> ) | Pore Size (Å) | Pore Volume (cc g <sup>-1</sup> ) |
|--------|----------------------------------------------------|---------------|-----------------------------------|
| NF     | 103.09                                             | 17.05         | 0.249                             |
| ZNF    | 34.49                                              | 15.33         | 0.194                             |
| CNF    | 56.85                                              | 15.30         | 0.218                             |

**Table S11** Calculated FWHM values from Raman profile after electrochemical measurement

| Sample | FWHM (cm <sup>-1</sup> ) |
|--------|--------------------------|
| NF     | 33.59                    |
| ZNF    | 37.57                    |
| CNF    | 34.30                    |

## References

- 1 M. K. Jaiswal and B. Choudhury, *ACS Appl. Nano Mater.*, 2022, **5**, 3599–3610.
- 2 Y. Lu, P. Yang, Y. Li, D. Wen, J. Luo, S. Wang, F. Wu, L. Fang and Y. Pang, *Molecules*, **2021**, *26* (16).
- 3 K. Bera, R. Madhu, H. N. Dhandapani, S. Nagappan, A. De and S. Kundu, *Inorg. Chem.*, 2022, **61**, 16895–16904.
- 4 K. B. Ibrahim, W. N. Su, M. C. Tsai, A. W. Kahsay, S. A. Chala, M. K. Birhanu, J. F. Lee and B. J. Hwang, *Mater. Today Chem.*, 2022, **24**, 100824.
- 5 M. Liu, K. A. Min, B. Han and L. Y. S. Lee, *Adv. Energy Mater.*, 2021, **11**, 2101281.
- 6 J. Jiang, F. Sun, S. Zhou, W. Hu, H. Zhang, J. Dong, Z. Jiang, J. Zhao, J. Li, W. Yan and M. Wang, *Nat. Commun.*, 2018, **9**, 1–12.
- 7 Y. Luo, Y. Wu, D. Wu, C. Huang, D. Xiao, H. Chen, S. Zheng and P. K. Chu, *ACS Appl. Mater. Interfaces*, 2020, **12**, 42850–42858.

- 8 J. Xie, J. Xin, R. Wang, X. Zhang, F. Lei, H. Qu, P. Hao, G. Cui, B. Tang and Y. Xie, *Nano Energy*, 2018, **53**, 74–82.
- 9 Y. Lin, H. Wang, C.-K. Peng, L. Bu, C.-L. Chiang, K. Tian, Y. Zhao, J. Zhao, Y.-G. Lin, J.-M. Lee, L. Gao, Y. Lin, L. Bu, K. Tian, Y. Zhao, J. Zhao, L. Gao, H. Wang, J. Lee, C. Peng and C. Chiang, *Small*, 2020, **16**, 2002426.
- 10 M. Zhang, Y. Liu, B. Liu, Z. Chen, H. Xu and K. Yan, *ACS Catal.*, 2020, **10**, 5179–5189.
- 11 R. Yang, Y. Zhou, Y. Xing, D. Li, D. Jiang, M. Chen, W. Shi and S. Yuan, *Appl. Catal. B*, 2019, **253**, 131–139.
- 12 X. Lu, N. Sakai, D. Tang, X. Li, T. Taniguchi, R. Ma and T. Sasaki, *ACS Appl. Mater. Interfaces*, 2020, **12**, 33083–33093.
